# Supplementary material
Source: publisher site journal article supplement (https://www.dovepress.com/get_supplementary_file.php?f=271013.docx)
Supplement: Supplementary file 1 [file get_supplementary_file.php]

# Supplementary Document 1

Subject Selection criteria

Inclusion criteria:

- Male and female subjects’ in general good health.
- Subjects in the age group 25-45 years (both the ages inclusive).
- Subjects willing to give a written informed consent and agree to come for a regular follow up visit.
- Hair density of >100 and <200 hair follicle per square cm as per Trichoscan measurement.
- Male and female Subjects falling under Grade 3 - Grade 6 of hair loss severity grade evaluated as per photo numerical10-point scale (Linear scale for assessment purpose-MSCR Scale).
- Subjects willing to abide by and comply with the study protocol.
- Subjects who have not participated in a similar investigation in the past three months.
- Subjects complaining of hair fall and damage.
- Healthy volunteers with no known allergy as established by medical history.
- Subjects who do not smoke or drink
- Subjects who are not crash dieting.
- Subjects who agree to refrain from using hair dye / hair colour during the study period.
- Subjects willing to refrain from any type of hair treatment like perming, straightening etc. during the study duration.
- Subjects who are willing to refrain from any other oil treatment/hair spa and oral medications for hair growth during the study.

Exclusion criteria:

- Subjects who have undergone hair growth treatment within 3 months before screening into the study.
- Subjects having any active scalp disease such as scalp Psoriasis which may interfere in the study- dermatologist’s judgement.
- Subjects who have taken chemotherapy for cancer in the 6 months prior to start of the study or have a plan to do treatments during study.
- Subjects who have history of alcoholism and/ or psychiatric disorder including trichotillomania.
- Subjects who have had hair transplant.
- Subjects who take pharmaceutical product which cause hirsutism (ex. phenytoin) and finesteride for androgenic alopecia.
- Subjects with a known history or present condition of allergic response/hypersensitivity to any cosmetic ingredients and pharmaceutical products.
- Subjects consuming alcohol and smoking
- Subjects on oral medications such as vitamin supplements, including multi-vitamins which will compromise the study.
- Subjects who are pregnant or lactating or nursing as established with medical history
- Subjects under medical treatment for hair problems, prescription drugs such as Minoxidil, Finasteride, or any 5 α-reductase inhibitor or light therapy.
- Subjects undergoing any chemical hair salon treatment-straightening / perming / colour
- Menopausal female subjects as determined by medical history.
- Subjects with chronic illness which may influence the cutaneous state.
- Subjects participating in other similar cosmetic or therapeutic trial within last three months.
- Subjects with medical history of thyroid disorders.
- Subjects with any history of underlying uncontrolled medical illness including diabetes mellitus, hypertension, HIV, hepatitis, severe anemia, serious disorder of heart and respiratory apparatus or any other serious medical illness.
- Subjects who have experienced a known stressful event within the last 6 months such as death in family, miscarriage etc.
